# Supplementary material
Source: Royal Society of Chemistry journal article supplement (doi:10.1039/d6cp00004e)
Supplement: d6cp00004e1.pdf [file d6cp00004e1.pdf]

**Formula:**

$$A(\omega) = 1 - R(\omega) - T(\omega) = 1 - |S_{11}(\omega)|^2 - |S_{21}(\omega)|^2 \quad (1)$$

$$A(\omega) \approx 1 - |S_{11}(\omega)|^2 \quad (2)$$

$$\varepsilon(\omega) = \varepsilon_\infty - \omega_p^2(\sigma) / (\omega^2 + i\gamma\omega) \quad (3)$$

$$\omega_p^2(\sigma) = \frac{\sigma}{\sigma_0} \omega_p^2(\sigma_0) \quad (4)$$

$$r \approx R_{12} + \sum (-1)^m T_{12} T_{21} (R_{21} R_{23})^{m-10} R_{23} e^{i2m\beta} \quad (5)$$

$$r = R_{12} + \frac{T_{12} R_{23} T_{21} e^{i\beta}}{1 - R_{21} R_{23} e^{i\beta}} \quad (6)$$

$$\text{RAB} = \frac{2(f_H - f_L)}{f_H + f_L} \times 100\%, \quad (7)$$

$$Z_r = \pm \sqrt{\frac{(1 + S_{11})^2 - S_{21}^2}{(1 - S_{11})^2 - S_{21}^2}} \quad (8)$$

**Chart data:**

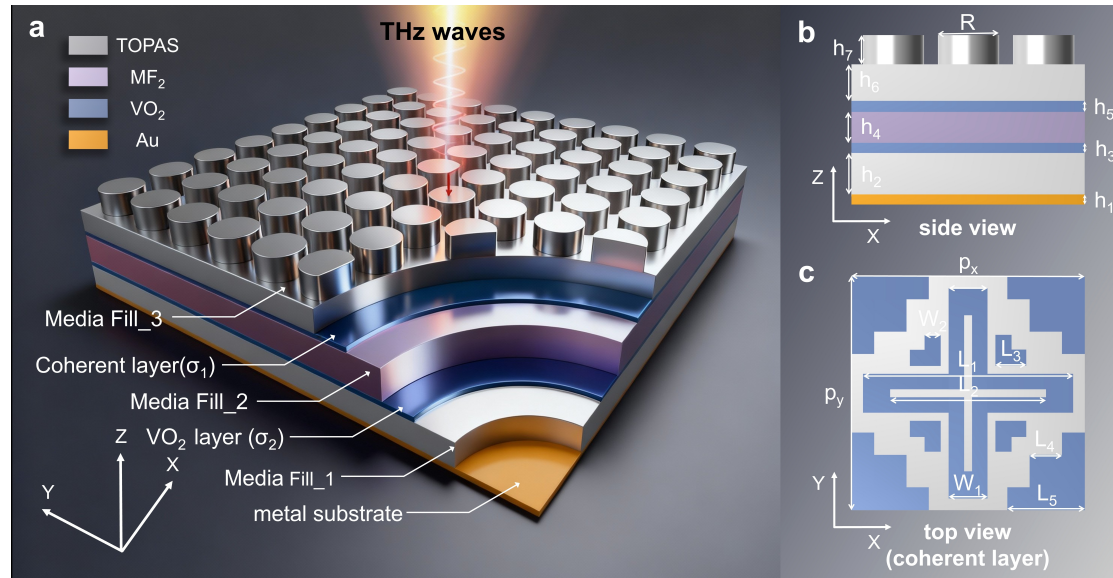

Fig. 1 Schematic of the proposed VO<sub>2</sub>-tunable TMA. (a) Three-dimensional view of the multilayer stack composed of the patterned VO<sub>2</sub> coherent layer and dielectric spacers backed by a metallic ground plane. (b) Cross-sectional view (y-z plane) of the unit cell with the layer thicknesses h<sub>1</sub>–h<sub>7</sub> and pillar diameter R labelled. (c) Top view of the coherent layer defining the in-plane geometric parameters (period p, feature lengths L<sub>1</sub>–L<sub>5</sub>, and line widths W<sub>1</sub>–W<sub>2</sub>).

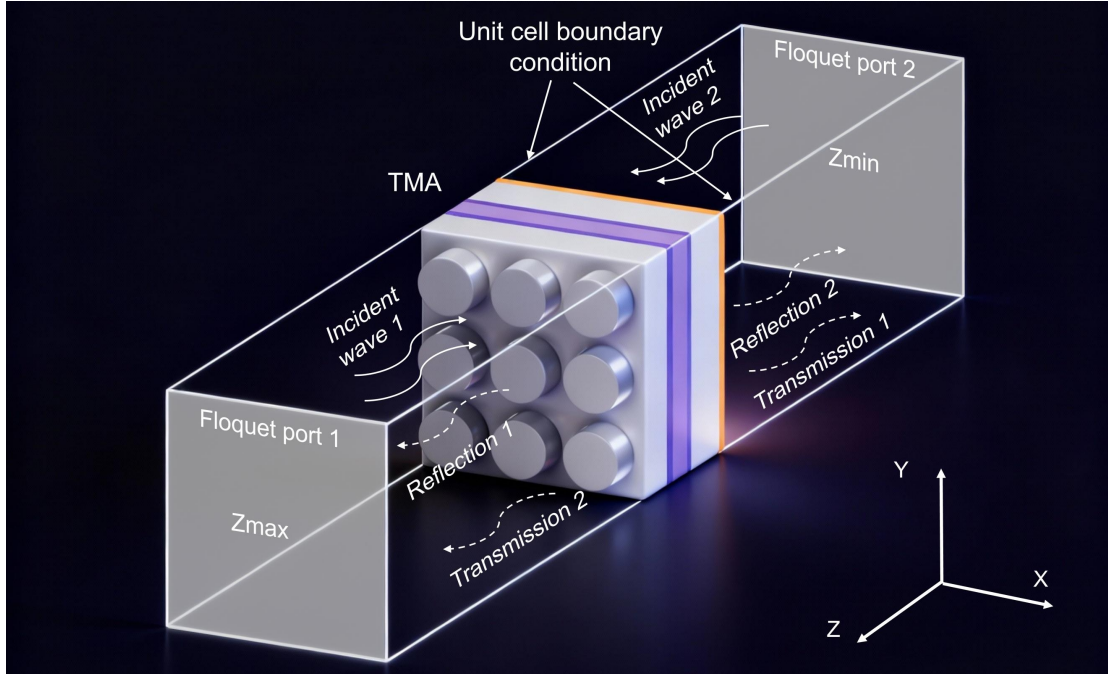

Fig. 2 Numerical model and boundary conditions used for the electromagnetic simulations. The periodic unit cell is excited by a normally incident plane wave using Floquet ports, with periodic boundaries applied along the x and y directions and open boundaries along z; the reflected and transmitted waves are monitored at the ports

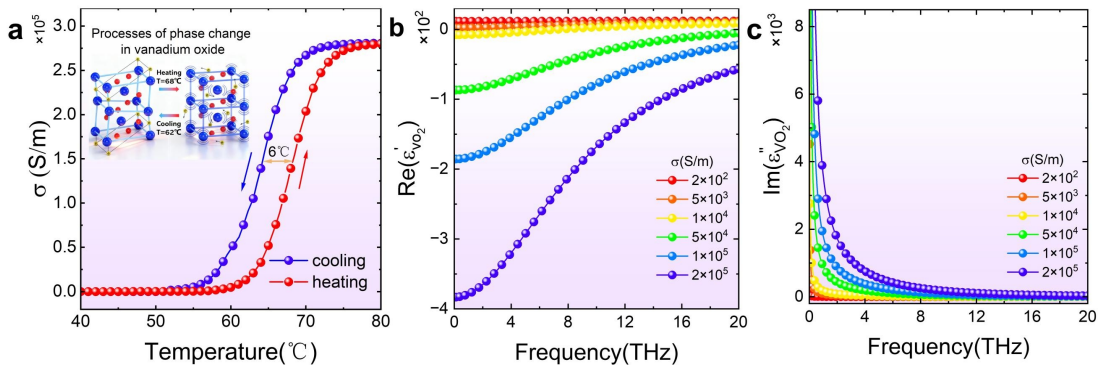

Fig. 3 Electrical response of VO<sub>2</sub> employed in the simulations. (a) Temperature-dependent conductivity  $\sigma$  of VO<sub>2</sub> illustrating the hysteretic phase transition behaviour (heating and cooling). (b) Real part and (c) imaginary part of the effective relative permittivity  $\epsilon_r(\omega)$  of VO<sub>2</sub> over 0.1–20 THz for different conductivities  $\sigma$ .

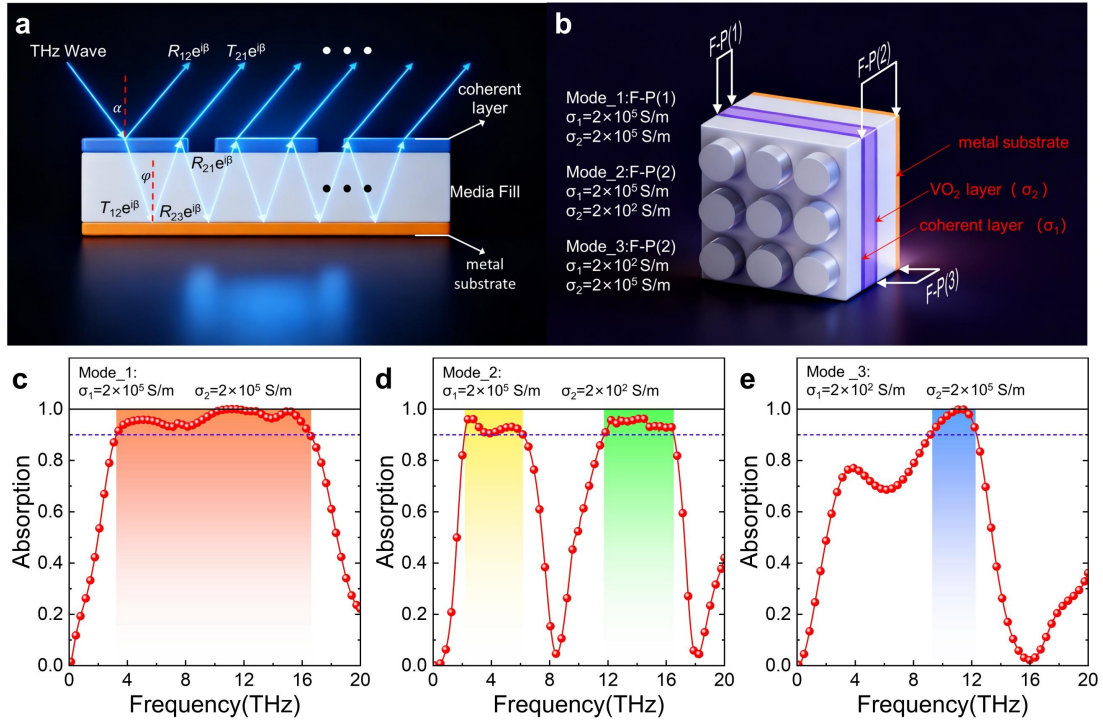

Fig. 4 Multi-mode absorption concept enabled by the VO<sub>2</sub>-tunable cavity configuration. (a) Schematic illustration of the multiple-reflection (F–P-like) interference picture in the metal–dielectric–metal stack. (b) Unit-cell configurations corresponding to different operating modes controlled by the VO<sub>2</sub> states in the coherent layer and the continuous VO<sub>2</sub> film. (c–e) Absorption spectra  $A(f)$  of Mode 1–Mode 3, showing the reconfigurable broadband/dualband/narrowband responses.

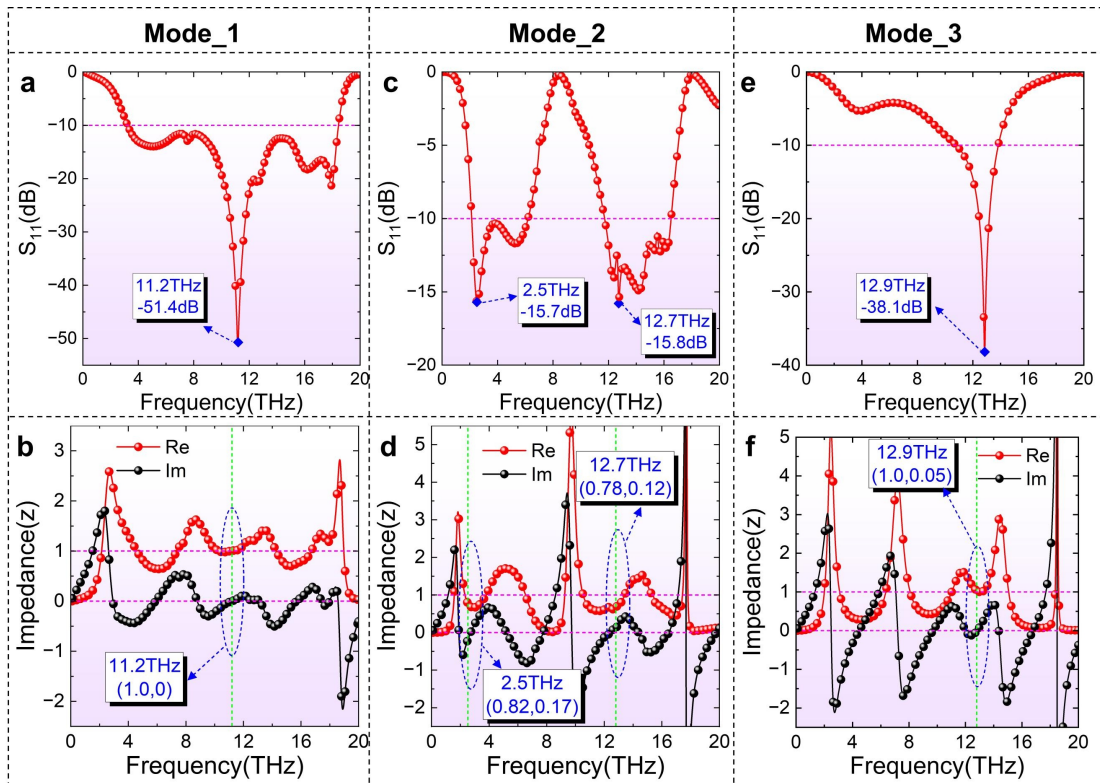

Fig. 5 Reflection and impedance characteristics for the three operating modes. (a), (c), (e) Simulated reflection coefficient  $|S_{11}|$  (in dB) for Mode 1– Mode 3. (b), (d), (f) Corresponding normalized effective impedance  $Z$  (real and imaginary parts) retrieved from the scattering parameters, evidencing impedance matching at the representative resonance frequencies.

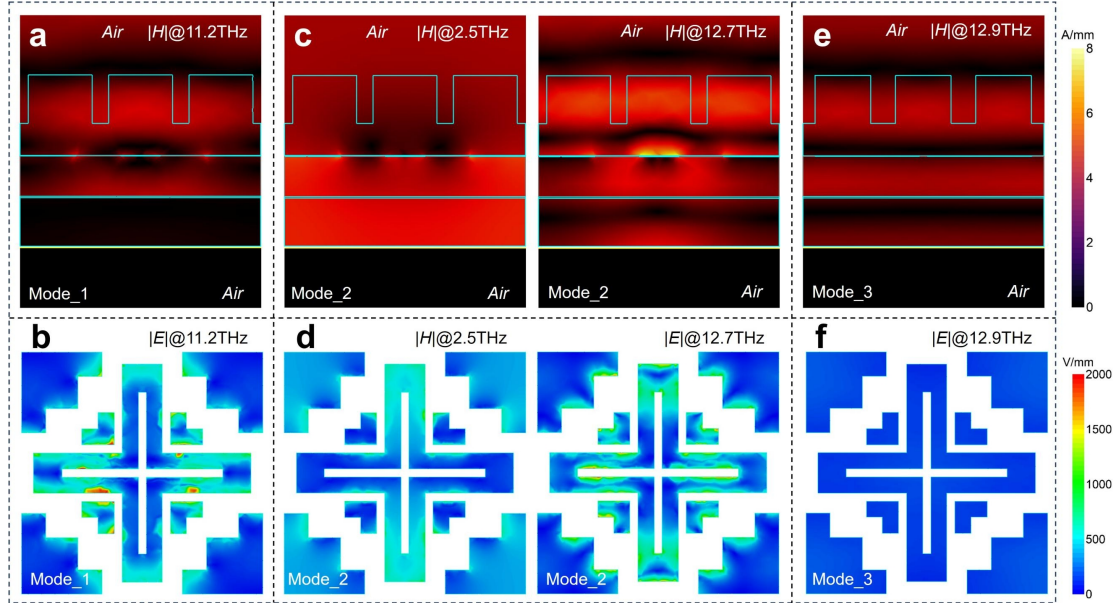

Fig. 6 Electromagnetic-field distributions revealing the physical origin of absorption in different modes. (a–c) Magnetic-field energy-density distributions  $|H|$  in the  $x$ – $z$  cross-section at representative frequencies  $f_1, f_2, f_3$ , and  $f_4$  for Mode 1–Mode 3. (d–f) Electric-field energy-density distributions  $|E|$  on the coherent-layer plane at the same frequencies, illustrating mode-dependent localization and dominant loss channels.

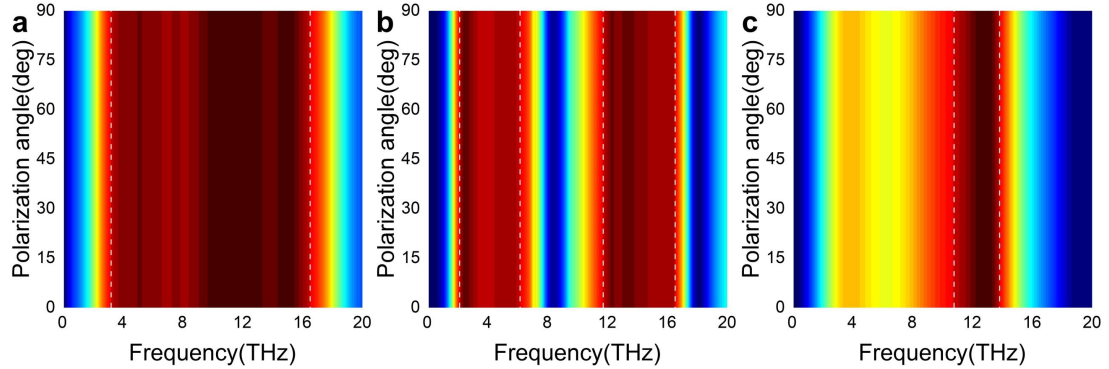

Fig. 7 Polarization robustness of the proposed TMA under normal incidence. Absorbance maps as a function of frequency and polarization angle ( $0^\circ$ – $90^\circ$ ) for (a) Mode 1, (b) Mode 2, and (c) Mode 3, demonstrating polarization-insensitive performance over the main absorption bands.

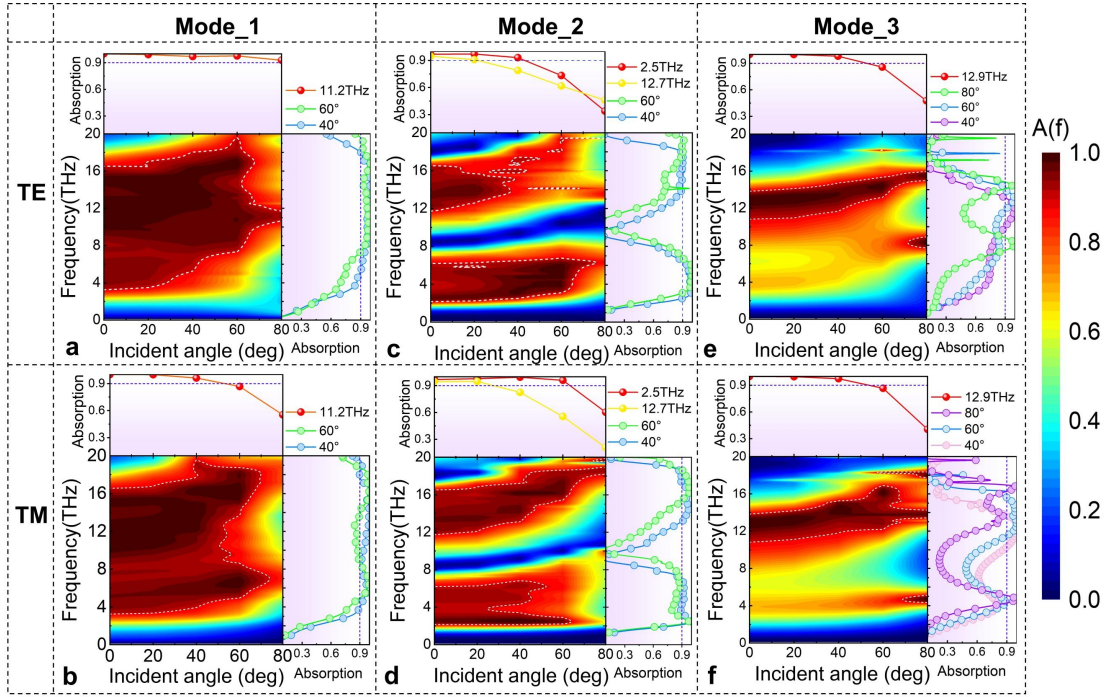

Fig. 8 Wide-angle absorption performance under oblique incidence. Angle-resolved absorptance maps for (a, b) Mode 1, (c, d) Mode 2, and (e, f) Mode 3 under TE and TM polarizations, respectively, with the incident angle varied from  $0^\circ$  to  $80^\circ$ . Insets indicate the absorptance evolution at selected representative frequencies.

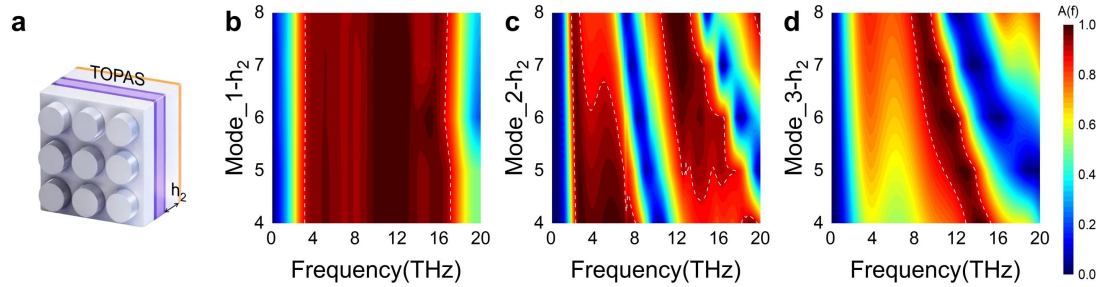

Fig. 9 Effect of the Media Fill\_1 (TOPAS) thickness  $h_2$  on the absorption performance. (a) Schematic indicating the parameter  $h_2$ . (b–d) Absorptance maps versus frequency as  $h_2$  varies for Mode 1–Mode 3, respectively, showing the sensitivity of the resonance condition to the cavity thickness.

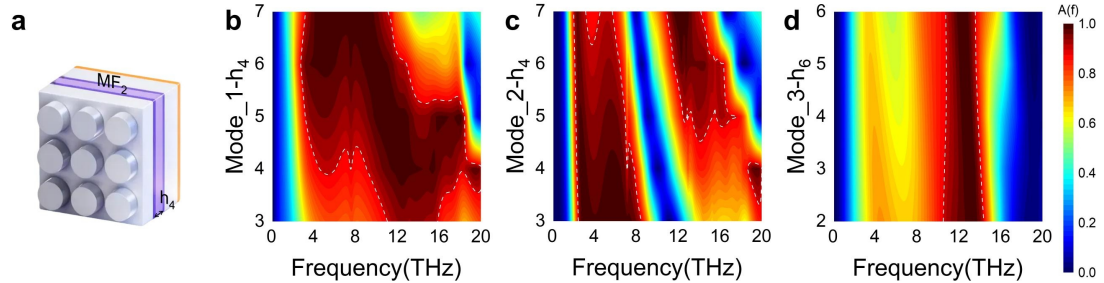

Fig. 10 Effect of the MF2 dielectric thickness on the absorption performance. (a) Schematic of the MF2 layers adjacent to VO<sub>2</sub>. (b–d) Absorptance maps versus frequency for Mode 1–Mode 3 as the MF2 thickness (e.g., the upper-side spacer  $h_4$ ) is varied, illustrating mode-dependent tuning of resonance position and spectral shape.

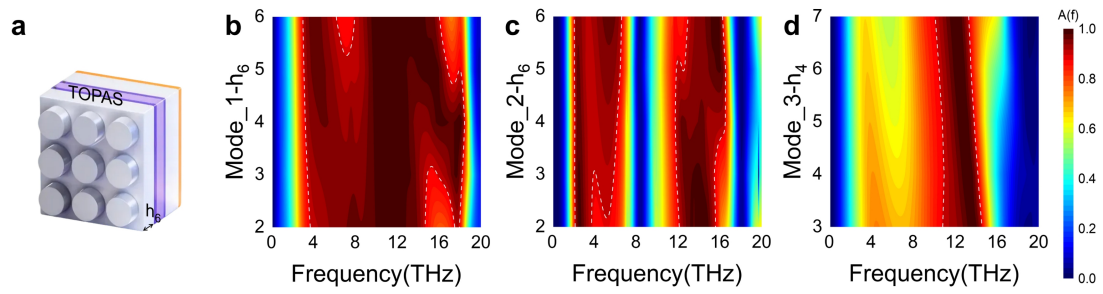

Fig. 11 Influence of the substrate thickness in Media Fill\_3 on the absorption response. (a) Schematic indicating the substrate-thickness parameter  $h_6$ . (b–d) Absorptance maps versus frequency for Mode 1–Mode 3 as  $h_6$  varies, demonstrating that this parameter primarily introduces auxiliary dielectric loading with limited resonance shifting.

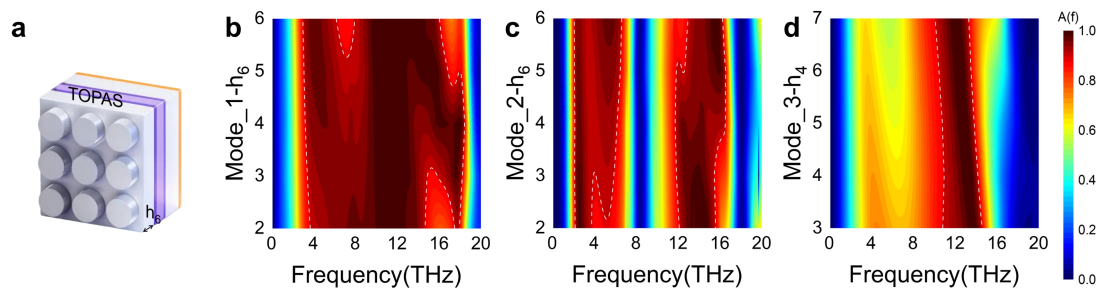

Fig. 12 Influence of the pillar height in Media Fill\_3 on the absorption response. (a) Schematic indicating the pillar-height parameter  $h_7$ . (b–d) Absorptance maps versus frequency for Mode 1–Mode 3 as  $h_7$  varies, showing the robustness of the absorption bands against moderate geometric perturbations.

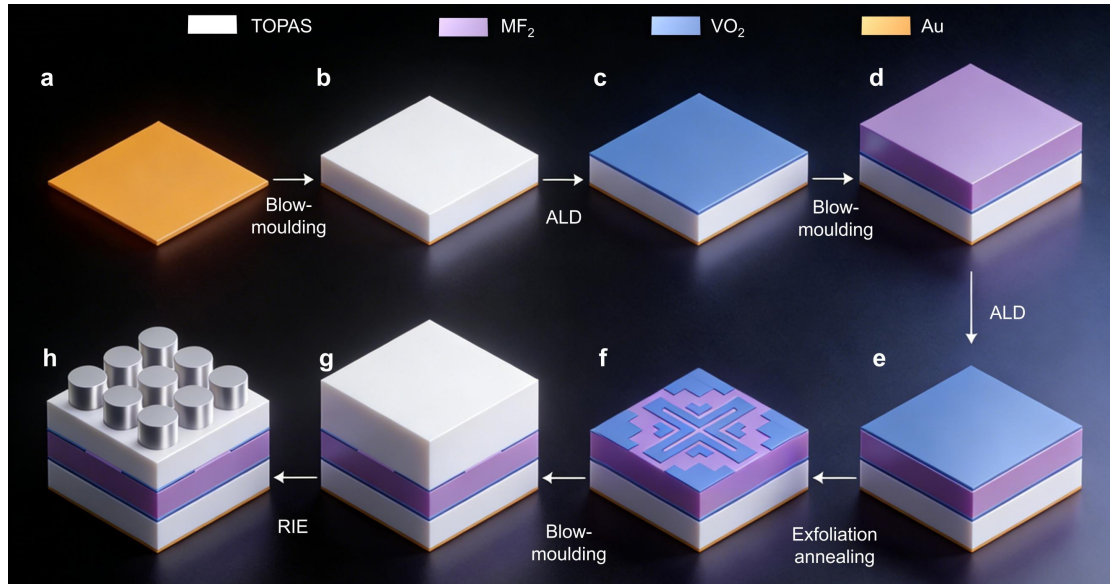

Fig. 13 Schematic illustration of a representative fabrication route for the proposed multilayer VO<sub>2</sub>-enabled terahertz absorber

Table 1 Structural parameters of the designed absorber (unit:  $\mu\text{m}$ )

| <b>Parameter</b> | <b>Value</b> | <b>Parameter</b> | <b>Value</b> |
|------------------|--------------|------------------|--------------|
| p                | 30           | R                | 4            |
| h1               | 0.2          | L1               | 27           |
| h2               | 6            | L2               | 20           |
| h3               | 0.07         | L3               | 4            |
| h4               | 5            | L4               | 4            |
| h5               | 0.07         | L5               | 10           |
| h6               | 4            | W1               | 5            |
| h7               | 6            | W2               | 2            |

Table 2 Comparison of the performance of the TMA proposed in this paper with other metamaterial absorbers operating in the same frequency spectrum.

| <b>References</b> | <b>Broadband bandwidth(RBW(%))</b> | <b>incident angles(deg) TE/TM</b> | <b>Absorption mode</b> | <b>Tunable material</b>            |
|-------------------|------------------------------------|-----------------------------------|------------------------|------------------------------------|
| [59]              | 3.85-7.10(59.4)                    | 60/70:>80%                        | 1                      | Black phosphorus & VO <sub>2</sub> |
| [60]              | 3.77 -9.5(86.36)                   | 45/60:>80%                        | 2                      | VO <sub>2</sub>                    |
| [61]              | 1.11-6.13(138.7)                   | 30/30:>90%                        | 2                      | VO <sub>2</sub>                    |
| [62]              | 0.86-3.54(121.8)                   | 60/50:>90%                        | 2                      | VO <sub>2</sub> & graphene         |
| [63]              | 2.6-6.28(82.9)                     | 45/65:>80%                        | 1                      | graphene                           |
| [64]              | 0.98-1.63(49.8)                    | 60/40:>80%                        | 2                      | VO <sub>2</sub> & graphene         |
| [65]              | 3-12.4(122.08)                     | 50/50:>80%                        | 1                      | VO <sub>2</sub> & graphene         |
| [66]              | 6-24 (120)                         | 30/30:>90%                        | 2                      | VO <sub>2</sub>                    |
| [67]              | 3.02-7.22(82.03)                   | 30/30:>90%                        | 2                      | VO <sub>2</sub>                    |
| [68]              | 3.36-6.98(71.85)                   | 50/50:>80%                        | 2                      | VO <sub>2</sub> & Si               |
| [69]              | 4.00-10.08(86.36)                  | 60/50:>80%                        | 1                      | VO <sub>2</sub>                    |
| This paper        | 3.25–16.56(124.4)                  | 60/60:>90%                        | 3                      | VO <sub>2</sub>                    |

## References:

- [1] Valathuru M, Pardhasaradhi P, Prasad N, et al. Photonics and Nanostructures-Fundamentals and Applications[J]. 2025, 64: 101381. DOI: [10.1016/j.photonics.2025.101381](https://doi.org/10.1016/j.photonics.2025.101381)
- [2] Akkas M A. Wireless Networks[J]. 2019, 25: 145–155. DOI: [10.1007/s11276-017-1548-4](https://doi.org/10.1007/s11276-017-1548-4)
- [3] Wei Q, Zhu W, Li T, et al. Science China Materials[J]. 2025. DOI: [10.1007/s40843-024-3230-1](https://doi.org/10.1007/s40843-024-3230-1)
- [4] Li W, Liu M, Cheng S, et al. Diamond and Related Materials[J]. 2024, 142: 110793. DOI: [10.1016/j.diamond.2024.110793](https://doi.org/10.1016/j.diamond.2024.110793)
- [5] Babu K V, Sree G N J, Das S, et al. Journal of Electronic Materials[J]. 2024, 53: 5566– 5579. DOI: [10.1007/s11664-024-11238-y](https://doi.org/10.1007/s11664-024-11238-y)
- [6] Zheng R, Liu Y, Ling L, et al. Diamond and Related Materials[J]. 2024, 141: 110713. DOI: [10.1016/j.diamond.2023.110713](https://doi.org/10.1016/j.diamond.2023.110713)
- [7] Padilla W J, Averitt R D. Nature Reviews Physics[J]. 2022, 4: 85–100. DOI: [10.1038/s42254-021-00394-3](https://doi.org/10.1038/s42254-021-00394-3)
- [8] Zhao C, Wang H, Bu Y, et al. Physical Chemistry Chemical Physics[J]. 2023, 25: 30145–30171. DOI: [10.1039/D3CP03346E](https://doi.org/10.1039/D3CP03346E)
- [9] Yan Z, Zhu L-G, Meng K, et al. Trends in Biotechnology[J]. 2022, 40: 816–830. DOI: [10.1016/j.tibtech.2021.12.002](https://doi.org/10.1016/j.tibtech.2021.12.002)
- [10] Wang W, Sun K, Xue Y, et al. Optics Communications[J]. 2024, 556: 130266. DOI: [10.1016/j.optcom.2024.130266](https://doi.org/10.1016/j.optcom.2024.130266)
- [11] Akyildiz I F, Jornet J M, Han C. Physical Communication[J]. 2014, 12: 16–32. DOI: [10.1016/j.phycom.2014.01.006](https://doi.org/10.1016/j.phycom.2014.01.006)
- [12] Han C, Akyildiz I F. IEEE Transactions on Terahertz Science and Technology[J]. 2016, 6: 541–553. DOI: [10.1109/TTHZ.2016.2569460](https://doi.org/10.1109/TTHZ.2016.2569460)
- [13] Elayan H, Amin O, Shihada B, et al. IEEE Open Journal of the Communications Society[J]. 2019, 1: 1–32. DOI: [10.1109/OJCOMS.2019.2953633](https://doi.org/10.1109/OJCOMS.2019.2953633)
- [14] Fan K, Averitt R D, Padilla W J. Nanophotonics[J]. 2022, 11: 3769–3803. DOI: [10.1515/nanoph-2022-0188](https://doi.org/10.1515/nanoph-2022-0188)
- [15] Huang Y, Wu X, Schalch J, et al. Physical Review Applied[J]. 2022, 18: 054086. DOI: [10.1103/PhysRevApplied.18.054086](https://doi.org/10.1103/PhysRevApplied.18.054086)
- [16] Landy N I, Sajuyigbe S, Mock J J, et al. Physical Review Letters[J]. 2008, 100: 207402. DOI: [10.1103/PhysRevLett.100.207402](https://doi.org/10.1103/PhysRevLett.100.207402)
- [17] Tao H, Bingham C M, Strikwerda A C, et al. Physical Review B-Condensed Matter and Materials Physics[J]. 2008, 78: 241103. DOI: [10.1103/PhysRevB.78.241103](https://doi.org/10.1103/PhysRevB.78.241103)

- [18] Iwaszczuk K, Strikwerda A C, Fan K, et al. Optics Express[J]. 2011, 20: 635–643. DOI: [10.1364/OE.20.000635](https://doi.org/10.1364/OE.20.000635)
- [19] Liu D M, Tu J Y, Wang D L, et al. Optical and Quantum Electronics[J]. 2024, 56: 1144. DOI: [10.1007/s11082-024-07086-z](https://doi.org/10.1007/s11082-024-07086-z)
- [20] Jepsen P U, Fischer B M, Thoman A, et al. Physical Review B-Condensed Matter and Materials Physics[J]. 2006, 74: 205103. DOI: [10.1103/PhysRevB.74.205103](https://doi.org/10.1103/PhysRevB.74.205103)
- [21] Huang Y, Wu X, Schalch J, et al. Physical Review Applied[J]. 2022, 18: 054086. DOI: [10.1103/PhysRevApplied.18.054086](https://doi.org/10.1103/PhysRevApplied.18.054086)
- [22] Gevorgyan L, Haroyan H, Parsamyan H, et al. RSC Advances[J]. 2023, 13: 11948–11958. DOI: [10.1039/D3RA01194A](https://doi.org/10.1039/D3RA01194A)
- [23] Li B, Meng R, Hou Y-H, et al. Applied Optics[J]. 2024, 63: 5886–5895. DOI: [10.1364/AO.525092](https://doi.org/10.1364/AO.525092)
- [24] Asif M, Riaz M Z, Hussain S. Solar Energy Materials and Solar Cells[J]. 2025, 293: 113883. DOI: [10.1016/j.solmat.2025.113883](https://doi.org/10.1016/j.solmat.2025.113883)
- [25] Liu Y, Huang R, Ouyang Z. Optics Express[J]. 2021, 29: 20839–20850. DOI: [10.1364/OE.428790](https://doi.org/10.1364/OE.428790)
- [26] Zhang B, Xu K-D. Journal of the Optical Society of America B[J]. 2021, 38: 3425–3434. DOI: [10.1364/JOSAB.439150](https://doi.org/10.1364/JOSAB.439150)
- [27] Tian X, Qiu X, Citrin D S, et al. Optics & Laser Technology[J]. 2023, 165: 109609. DOI: [10.1016/j.optlastec.2023.109609](https://doi.org/10.1016/j.optlastec.2023.109609)
- [28] Wang X, Ma C, Xiao L, et al. Applied Optics[J]. 2022, 61: 1646–1651. DOI: [10.1364/AO.448619](https://doi.org/10.1364/AO.448619)
- [29] Liu Y, Hu L, Liu M. Nanomaterials[J]. 2024, 14: 1200. DOI: [10.3390/nano14141200](https://doi.org/10.3390/nano14141200)
- [30] Z. Miao, Q. Wu, X. Li, Q. He, K. Ding, Z. An, Y. Zhang and L. Zhou, Physical Review X, 2015, 5, 041027. DOI: [10.1103/PhysRevX.5.041027](https://doi.org/10.1103/PhysRevX.5.041027)
- [31] Buchnev O, Podoliak N, Kaltenecker K, et al. ACS Photonics[J]. 2020, 7: 3199–3206. DOI: [10.1021/acsp Photonics.0c01263](https://doi.org/10.1021/acsp Photonics.0c01263)
- [32] Cheng Y, Zhao H, Li C. Optical Materials[J]. 2020, 109: 110369. DOI: [10.1016/j.optmat.2020.110369](https://doi.org/10.1016/j.optmat.2020.110369)
- [33] Gu J, Singh R, Liu X, et al. Nature Communications[J]. 2012, 3: 1151. DOI: [10.1038/ncomms2153](https://doi.org/10.1038/ncomms2153)
- [34] Yang Z, Li A, Wang Z, et al. Physica E: Lowdimensional Systems and Nanostructures[J]. 2025, 173: 116323. DOI: [10.1016/j.physe.2025.116323](https://doi.org/10.1016/j.physe.2025.116323)
- [35] Islam M A, Ahmed M R, Jyoti O, et al. Optics Continuum[J]. 2025, 4: 756–769. DOI: [10.1364/OPTCON.557405](https://doi.org/10.1364/OPTCON.557405)
- [36] Gohor M S, Tonmoy M H, Ebon M I R, et al. Results in Optics[J]. 2025: 100886. DOI: [10.1016/j.rio.2025.100886](https://doi.org/10.1016/j.rio.2025.100886)

- [37] Ramachandran T, Faruque M R I, Al-Mugren K S. Results in Engineering[J]. 2024, 21: 101753. DOI: [10.1016/j.rineng.2024.101753](https://doi.org/10.1016/j.rineng.2024.101753)
- [38] Hasan M S, Islam M T, Mansor M F, et al., Optics & Laser Technology, 2025, 184, 112546. DOI: [10.1016/j.optlastec.2025.112546](https://doi.org/10.1016/j.optlastec.2025.112546)
- [39] Wang H, Zhou W, Zhang Y, et al. Diamond and Related Materials[J]. 2025: 112678. DOI: [10.1016/j.diamond.2025.112678](https://doi.org/10.1016/j.diamond.2025.112678)
- [40] Luo Y, Qiu K, Xu T, et al. Engineering Applications of Artificial Intelligence[J]. 2025, 151: 110801. DOI: [10.1016/j.engappai.2025.110801](https://doi.org/10.1016/j.engappai.2025.110801)
- [41] Zhu Y, Cui Z, Zhang S, et al. Solid State Communications[J]. 2025: 116087. DOI: [10.1016/j.ssc.2025.116087](https://doi.org/10.1016/j.ssc.2025.116087)
- [42] Cui Z, Liu N, Zhang Y, et al. Optics Communications[J]. 2024, 570: 130874. DOI: [10.1016/j.optcom.2024.130874](https://doi.org/10.1016/j.optcom.2024.130874)
- [43] Zhong M. Optics & Laser Technology[J]. 2021, 139: 106930. DOI: [10.1016/j.optlastec.2021.106930](https://doi.org/10.1016/j.optlastec.2021.106930)
- [44] Yeasmin F, Mollah M A, Kaium S M A. Engineering Research Express[J]. 2025, 7: 045312. DOI: [10.1088/2631-8695/ae0de7](https://doi.org/10.1088/2631-8695/ae0de7)
- [45] Valathuru M, Pardhasaradhi P, Prasad N, et al. Photonics and Nanostructures-Fundamentals and Applications[J]. 2025, 64: 101381. DOI: [10.1016/j.photonics.2025.101381](https://doi.org/10.1016/j.photonics.2025.101381)
- [46] Huang X, He X, Guo L, et al. Journal of Optics[J]. 2015, 17: 055101. DOI: [10.1088/2040-8978/17/5/055101](https://doi.org/10.1088/2040-8978/17/5/055101)
- [47] Park G C, Park K. Scientific Reports[J]. 2021, 11: 19575. DOI: [10.1038/s41598-021-98654-w](https://doi.org/10.1038/s41598-021-98654-w)
- [48] Wang J, Yang J, Mei Y. Journal of Physics D: Applied Physics[J]. 2025, 58: 203001. DOI: [10.1088/1361-6463/adb590](https://doi.org/10.1088/1361-6463/adb590)
- [49] Zhou X, Liu T, Wang C, et al. International Journal of Thermal Sciences[J]. 2026, 220: 110402. DOI: [10.1016/j.ijthermalsci.2025.110402](https://doi.org/10.1016/j.ijthermalsci.2025.110402)
- [50] Liu Z, Yan H, Xiao Z, et al. International Journal of Thermal Sciences[J]. 2026, 221: 110443. DOI: [10.1016/j.ijthermalsci.2025.110443](https://doi.org/10.1016/j.ijthermalsci.2025.110443)
- [51] Zheng R, Liu Y, Ling L, et al. Diamond and Related Materials[J]. 2024, 141: 110713. DOI: [10.1016/j.diamond.2023.110713](https://doi.org/10.1016/j.diamond.2023.110713)
- [52] Zhang Y, Deng X-H, Geng J, et al. Materials Research Bulletin[J]. 2025: 113589. DOI: [10.1016/j.materresbull.2025.113589](https://doi.org/10.1016/j.materresbull.2025.113589)
- [53] Zhen F, Liu Y, Dong J, et al. Frontiers in Physics[J]. 2025, 13: 1560761. DOI: [10.3389/fphy.2025.1560761](https://doi.org/10.3389/fphy.2025.1560761)
- [54] Zou Y, Lin H, Tian G, et al. Materials[J]. 2023, 16: 4719. DOI: [10.3390/ma16134719](https://doi.org/10.3390/ma16134719)

- [55] Ren J, Zhang T, Li J. Journal of the Optical Society of America B[J]. 2025, 42: 553–562. DOI: [10.1364/JOSAB.546445](https://doi.org/10.1364/JOSAB.546445)
- [56] Genikala S, Ghosh A, Mondal P, et al. Plasmonics[J]. 2025. DOI: [10.1007/s11468-025-03043-y](https://doi.org/10.1007/s11468-025-03043-y)
- [57] Wang Y, Chen Y, Liu F, et al. Scientific Reports[J]. 2025, 15: 10140. DOI: [10.1038/s41598-025-94645-3](https://doi.org/10.1038/s41598-025-94645-3)
- [58] Cui Y, Zhang Z, Xie Z, et al. Plasmonics[J]. 2025, 1–10. DOI: [10.1007/s11468-025-03146-6](https://doi.org/10.1007/s11468-025-03146-6)
- [59] Wang T, Qu L, Qu L, et al. Journal of Physics D: Applied Physics[J]. 2020, 53: 145105. DOI: [10.1088/1361-6463/ab6af4](https://doi.org/10.1088/1361-6463/ab6af4)
- [60] Ren J, Zhang T, Li J. Journal of the Optical Society of America B[J]. 2025, 42: 553–562. DOI: [10.1364/JOSAB.546445](https://doi.org/10.1364/JOSAB.546445)
- [61] Zhao J, Yang H, Shan X, et al. Optics Communications[J]. 2023, 545: 129701. DOI: [10.1016/j.optcom.2023.129701](https://doi.org/10.1016/j.optcom.2023.129701)
- [62] Wen J, Sun W, Liang B, et al. Optics Communications[J]. 2023, 545: 129710. DOI: [10.1016/j.optcom.2023.129710](https://doi.org/10.1016/j.optcom.2023.129710)
- [63] Huang X, Cao M, Wang D, et al. Optical Materials Express[J]. 2022, 12: 811–822. DOI: [10.1364/OME.451450](https://doi.org/10.1364/OME.451450)
- [64] Wu G, Li C, Wang D, et al. Physical Chemistry Chemical Physics[J]. 2024, 26: 8993–9004. DOI: [10.1039/D4CP00268G](https://doi.org/10.1039/D4CP00268G)
- [65] Zhang Z, Song Q, Yi Z, et al. Diamond and Related Materials[J]. 2024, 149: 111664. DOI: [10.1016/j.diamond.2024.111664](https://doi.org/10.1016/j.diamond.2024.111664)
- [66] Shui B, Yi Y, Ma C, et al. Dalton Transactions[J]. 2024, 53: 10618–10625. DOI: [10.1039/D4DT01158A](https://doi.org/10.1039/D4DT01158A)
- [67] Niu J, Hui Q, Mo W, et al. Physical Chemistry Chemical Physics[J]. 2024, 26: 10633–10640. DOI: [10.1039/D4CP00081A](https://doi.org/10.1039/D4CP00081A)
- [68] Song Q, Cheng X, Liu T, et al. Physical Chemistry Chemical Physics[J]. 2023, 25: 29061–29069. DOI: [10.1039/D3CP03709F](https://doi.org/10.1039/D3CP03709F)
- [69] Wang D, Wang W, Jia Y, et al. Physical Chemistry Chemical Physics[J]. 2025, 27: 7447–7455. DOI: [10.1039/D4CP04836A](https://doi.org/10.1039/D4CP04836A)
